# Supplementary material for: Metagenomic approach reveals microbial diversity and predictive microbial metabolic pathways in Yucha, a traditional Li fermented food
Source: PubMed Central journal article supplement (PMC5006176; doi:10.1038/srep32524), 2016-08-31
Supplement: srep32524-s1.pdf [file srep32524-s1.pdf]

**Metagenomic approach reveals microbial diversity and predictive microbial metabolic pathways in Yucha, a traditional Li fermented food**

Jiachao Zhang, Xiaoru Wang, Dongxue Huo, Wu Li, Qisong Hu, Chuanbiao Xu, Sixin Liu, Congfa Li\*

**The supplementary information including Table S1 and Figure S1**

**Table S1** The detailed of sequencing information in present research

| <b>Sample Name</b> | <b>Barcode</b> | <b>Sequences</b> | <b>Bases (bp)</b> | <b>Average Length (bp)</b> |
|--------------------|----------------|------------------|-------------------|----------------------------|
| <b>QZU1</b>        | ACGTCTG        | 26636            | 11978131          | 449.7                      |
| <b>QZU2</b>        | GCGTCT         | 23834            | 10721289          | 449.83                     |
| <b>QZU3</b>        | ACGTGA         | 26690            | 12002644          | 449.71                     |
| <b>QZU4</b>        | CCGTGC         | 27994            | 12591088          | 449.78                     |
| <b>QZU5</b>        | GCGTGT         | 23676            | 10606551          | 447.99                     |
| <b>QZU6</b>        | ACTACA         | 24646            | 11041888          | 448.02                     |
| <b>CJU1</b>        | GCTACG         | 25334            | 11394688          | 449.78                     |
| <b>CJU2</b>        | CCTACT         | 26319            | 11841518          | 449.92                     |
| <b>CJU3</b>        | GCTAGA         | 22451            | 10097414          | 449.75                     |
| <b>CJU4</b>        | ACTAGC         | 25000            | 11223094          | 448.92                     |
| <b>CJU5</b>        | CCTAGT         | 24663            | 11088415          | 449.6                      |
| <b>CJU6</b>        | GCTATC         | 25076            | 11279783          | 449.82                     |
| <b>BTU1</b>        | CGAGCA         | 24982            | 11238509          | 449.86                     |
| <b>BTU2</b>        | AGAGCG         | 23491            | 10566724          | 449.82                     |
| <b>BTU3</b>        | GGAGCT         | 23060            | 10309237          | 447.06                     |
| <b>BTU4</b>        | AGAGGA         | 23500            | 10552342          | 449.04                     |
| <b>BTU5</b>        | GGAGGT         | 27116            | 12204493          | 450.08                     |
| <b>BTU6</b>        | CGAGTC         | 23543            | 10591932          | 449.9                      |
| <b>BSU1</b>        | GGAGTG         | 24550            | 11046171          | 449.95                     |
| <b>BSU2</b>        | GGCTCG         | 25214            | 11333031          | 449.47                     |
| <b>BSU3</b>        | AGCTCT         | 23987            | 10779060          | 449.37                     |
| <b>BSU4</b>        | GGCTGA         | 28068            | 12557767          | 447.41                     |
| <b>BSU5</b>        | AGCTGC         | 24955            | 11211338          | 449.26                     |
| <b>BSU6</b>        | AGTCCA         | 27612            | 12424918          | 449.98                     |

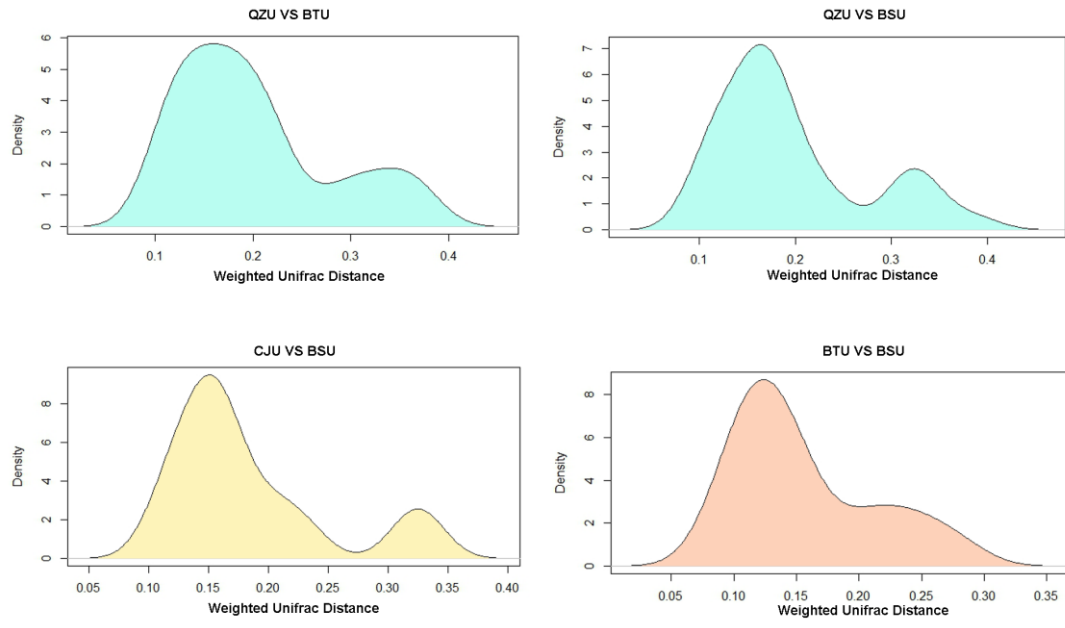

**Figure S1** Weighted UniFrac distances between different sample groups.
